# Supplementary material
Source: PubMed Central journal article supplement (PMC6068425)
Supplement: EMBJ-37-e98402-s001.pdf [file EMBJ-37-e98402-s001.pdf]

## Expanded View Figures

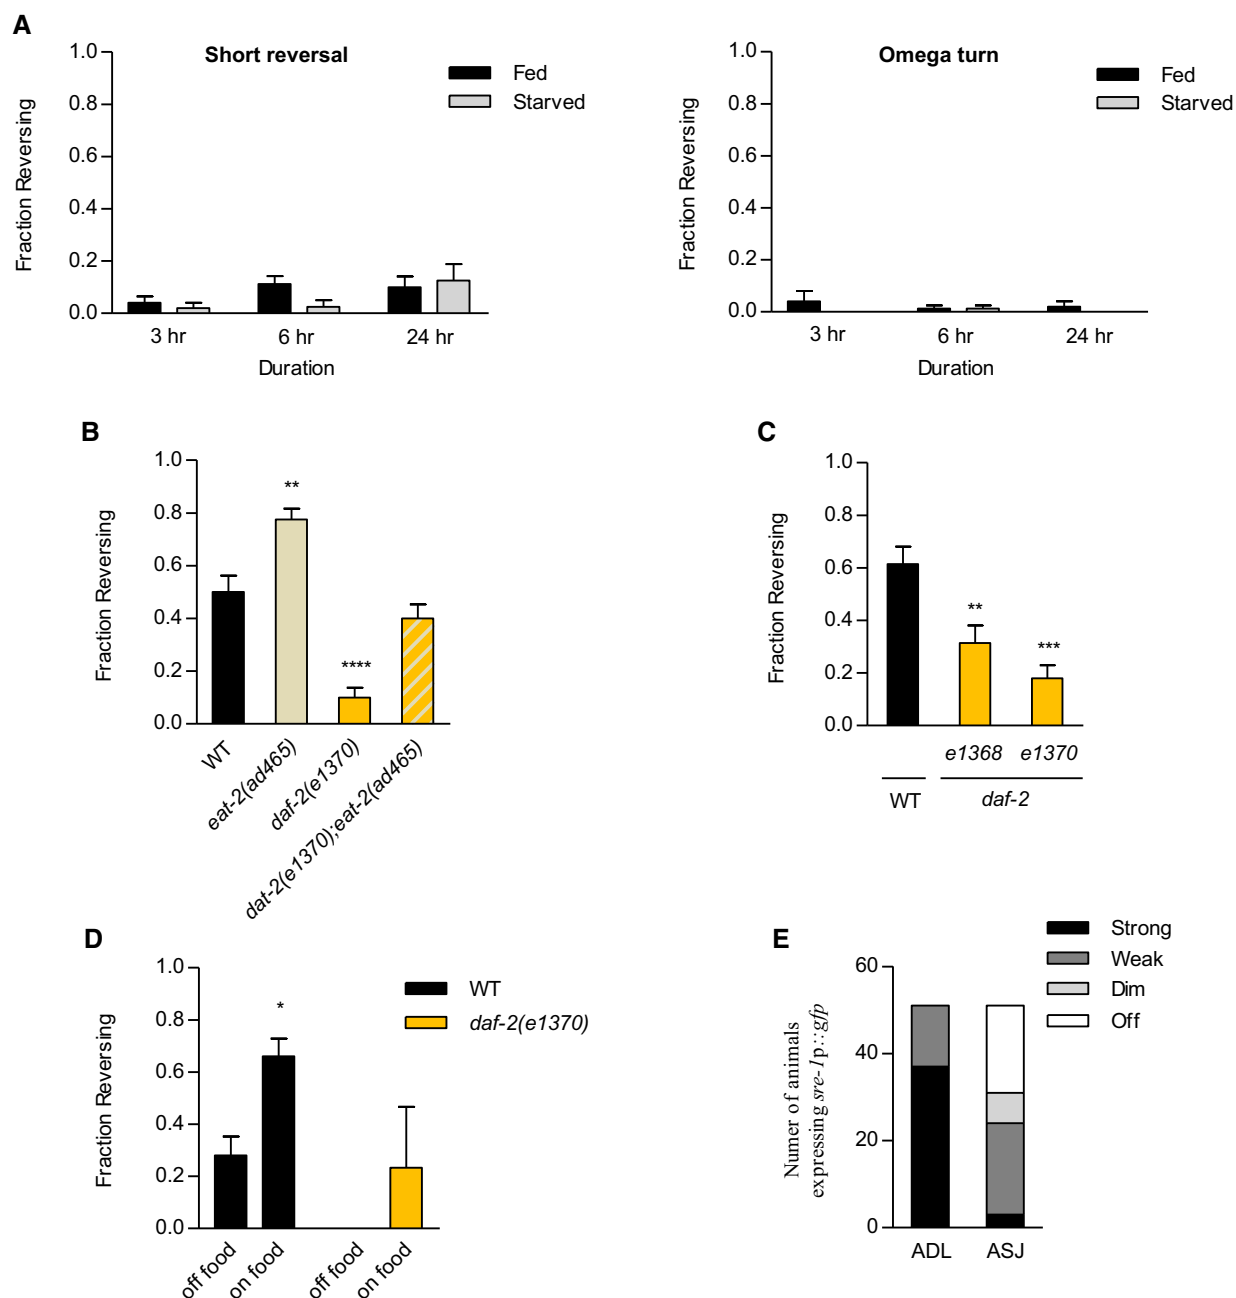

**Figure EV1. Effect of DAF-2/insulin-like receptor and feeding status on *ascr#3* avoidance.**

A Fraction reversing of wild-type animals exhibiting short reversal (left) and omega turn under different feeding conditions (right).  $n = 40-80$ .

B Fraction reversing of wild-type animals and *eat-2* mutants, *daf-2* mutants, and *eat-2;daf-2* double mutants under fed conditions.  $n = 80-110$ . \*\* $P < 0.01$  and \*\*\*\* $P < 0.0001$  (Dunnett's Test).

C Fraction reversing of *daf-2* alleles, *e1368*, and *e1370* in response to 500 nM *ascr#3* in fed conditions.  $n = 50-70$ . \*\* $P < 0.01$  and \*\*\* $P < 0.001$  (Dunnett's test).

D Fraction reversing of wild-type and *daf-2* mutant animals on on-food or off-food conditions.  $n = 30-50$ . \* $P < 0.05$  (Bonferroni's test).

E The number of transgenic animals expressing *sre-1p::gfp* in ADL and ASJ.  $n = 31$ .

Data information: All error bars represent  $\pm$  SEM.

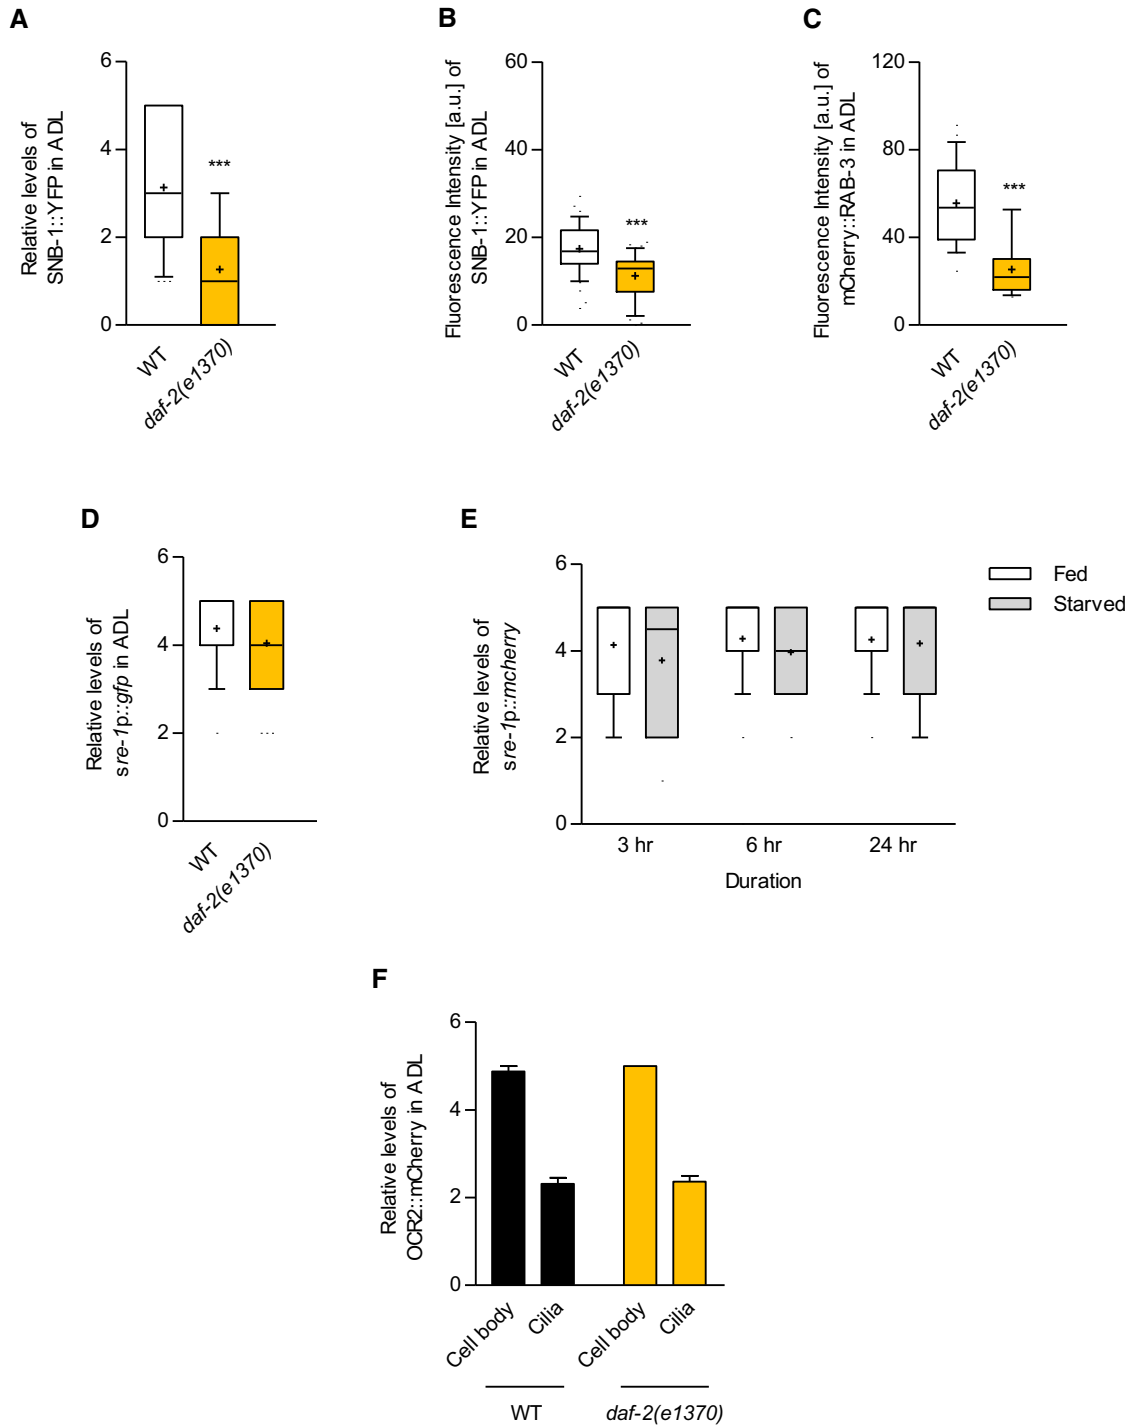

**Figure EV2. Quantification of SNB-1::YFP and mCherry::RAB-3 and gene expression of *sre-1* promoter upon *daf-2* mutation or starvation.**

- A Relative fluorescence intensity of integrated animals expressing *sre-1p::snb-1* cDNA::yfp.  $n = 30$ . \*\*\* $P < 0.0001$  (unpaired Student's  $t$ -test).  
 B, C Quantification of fluorescence intensity of wild-type and *daf-2* mutant animals expressing *sre-1p::snb-1* cDNA::yfp (B) and *sre-1p::mCherry::rab-3* cDNA (C) analyzed using ImageJ software.  $n = 13-41$ . \*\*\* $P < 0.001$  (unpaired Student's  $t$ -test).  
 D Relative fluorescence intensity of *daf-2* mutants expressing *sre-1p::gfp*.  $n = 50$ .  
 E Relative fluorescence intensity of transgenic animals expressing *sre-1p::mCherry* in fed and starved conditions.  $n = 29-35$ .  
 F Relative fluorescence intensity of wild-type and *daf-2* mutant animals expressing *sre-1p::ocr-2* genome::mcherry.  $n = 41$ .

Data information: All error bars represent  $\pm$  SEM. Tops and bottoms of boxes indicate the 25<sup>th</sup> and 75<sup>th</sup> percentiles, respectively; whiskers represent 10<sup>th</sup>–90<sup>th</sup> percentile. Median is indicated by a horizontal line, and the average is marked by “+” in the box.

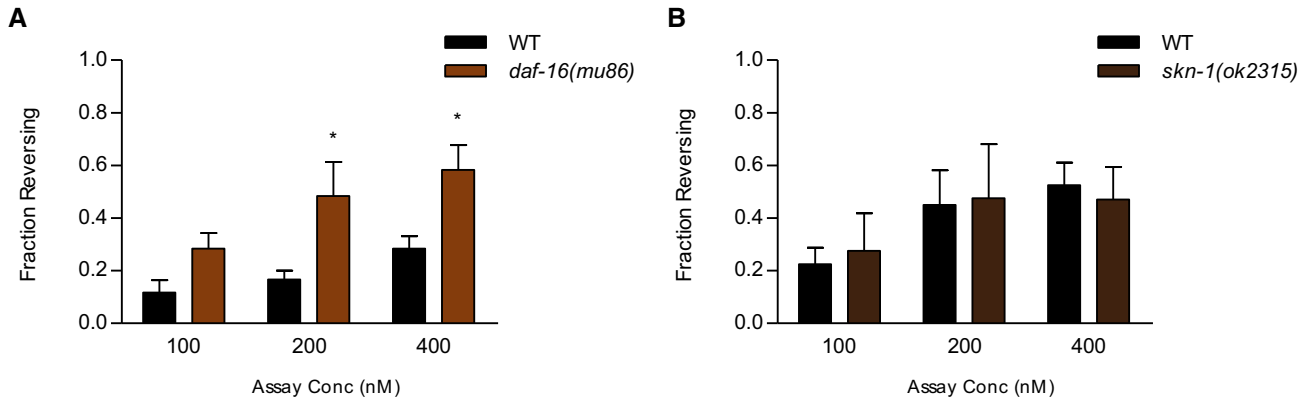

**Figure EV3. *ascr#3* avoidance behaviors of *daf-16* mutants and of *skn-1* mutants.**

A, B Fraction reversing of *daf-16* mutants (A) and *skn-1* mutants (B) in response to 100, 200, and 400 nM *ascr#3* under fed conditions. (A)  $n = 60$ ,  $*P < 0.05$  (Bonferroni's test). (B)  $n = 40-50$ .

Data information: All error bars represent  $\pm$  SEM.

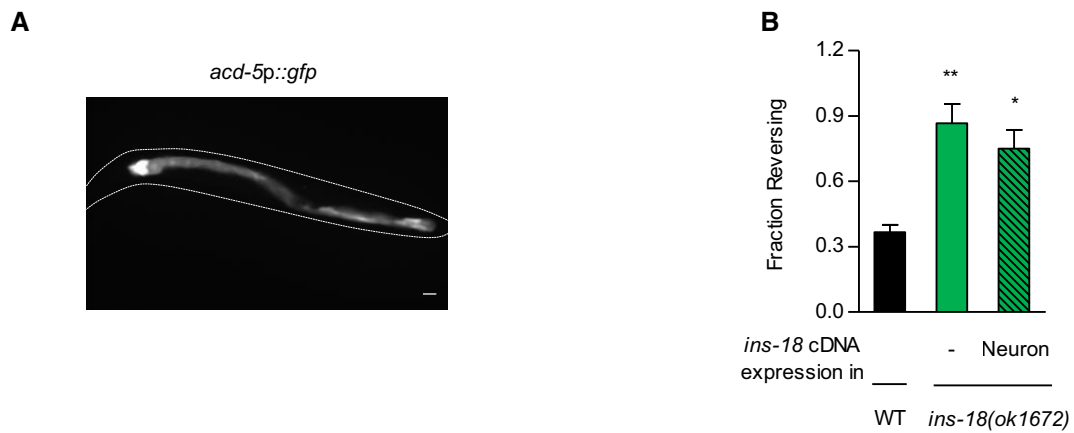

**Figure EV4. Expression pattern of *acd-5* promoter in the intestine and neuronal rescue of *ins-18* phenotype.**

A A representative image of a transgenic animal expressing *acd-5p::gfp*. Scale bar is 10  $\mu$ m.

B Fraction reversing of wild-type animals, *ins-18* mutants, and *ins-18* mutants expressing *su006(rgef-1)p::ins-18* cDNA::gfp (neuron).  $n = 30-40$ .  $*P < 0.05$  and  $**P < 0.01$  (Dunnett's test).

Data information: Error bars represent  $\pm$  SEM.

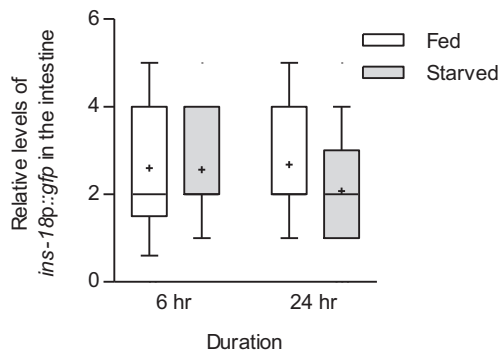

**Figure EV5. Expression of *ins-18* promoter upon starvation.**

Relative fluorescence intensity of expressing *ins-18p::gfp* in the intestine in 6-h and 24-h fed and starved conditions.  $n = 25-40$ . Tops and bottoms of boxes indicate the 25<sup>th</sup> and 75<sup>th</sup> percentiles, respectively; whiskers represent 10<sup>th</sup>-90<sup>th</sup> percentile. Median is indicated by a horizontal line, and the average is marked by "+" in the box.
